# Supplementary material
Source: publisher figshare collection journal article supplement (https://acs.figshare.com/ndownloader/files/10164303)
Supplement: Supplementary file 1 [file 10164303]

# **Supporting Information for:**

## **HU-331 and Oxidized Cannabidiol Act as Inhibitors of Human Topoisomerase II $\alpha$ and $\beta$**

James T. Wilson, Cole A. Fief, Klarissa D. Jackson, Susan L. Mercer, and  
Joseph E. Deweese\*

### Table of Contents:

|         |                                                                          |
|---------|--------------------------------------------------------------------------|
| Page 2: | Supplemental Methods: LC-MS/MS Analysis of CBD, Oxidized CBD, and HU-331 |
| Page 3: | Figure S1: LC-MS/MS Analysis of CBD and HU-331.                          |
| Page 4: | Figure S2: Analysis of Oxidation of CBD in Solution.                     |
| Page 5: | Figure S3: KFC-oxidized CBD.                                             |
| Page 6: | Figure S4: Analysis of KOH-oxidized Cannabidiol.                         |
| Page 7: | Figure S5: UV Absorbance Spectra for CBD, Oxidized CBD, and HU-331.      |
| Page 8  | Figure S6: KOH-oxidized CBD.                                             |

### \*Contact Information for Corresponding Author:

Joseph E. Deweese  
Lipscomb University College of Pharmacy  
One University Park Drive  
Nashville, TN 37204-3951  
Phone: 615-966-7101  
Email: Joe.Deweese@lipscomb.edu

### **LC-MS/MS Analysis of Cannabidiol, Oxidized Cannabidiol, and HU-331.**

Cannabidiol and HU-331 were subjected to LC-MS/MS analysis to develop a method for detection and relative quantitation. LC-MS/MS analysis was performed using a Thermo TSQ Quantum Triple Quadrupole mass spectrometer coupled to a Thermo Accela HPLC/UHPLC system. An aliquot (20  $\mu$ l) was injected into the equilibrated HPLC system using a Thermo PAL autoinjector. The following solvents were used – Mobile Phase A: Optima LC-MS-grade water (Fisher Scientific) with 0.1% (v/v) formic acid, and Mobile Phase B: Optima LC-MS-grade acetonitrile (Fisher Scientific) with 0.1% (v/v) formic acid. Compound separation was achieved using a Kinetex EVO C18 column (2.6  $\mu$ m, 50 mm x 2.1 mm, 100 Å) (Phenomenex Inc., Torrance, CA) with a flow rate of 0.3 ml/min and column oven temperature 30°C. The LC gradient system was as follows: 30 to 95% B (0 – 2 minutes), 95% B (2 – 4 minutes), 95 to 30% B (4 – 4.5 minutes), and 30% B (4.5 – 5 minutes). The mass spectrometer was operated in positive ion mode using electrospray ionization (ESI+). MS spectral data were analyzed by Thermo Xcalibur software 2.0.

Standard solutions of CBD and HU-331 (20 mM in DMSO) were diluted to 20  $\mu$ M in acetonitrile for LC-MS/MS analysis. Collision induced dissociation of the precursor ion m/z 315 for CBD and m/z 329 for HU-331 was performed in product ion mode at collision energy 21 V to identify the characteristic fragmentation pattern for each compound (**Figure S1**). Next, a selected reaction monitoring (SRM) method was developed for compound detection using the precursor-to-product ion transitions m/z 315  $\rightarrow$  259 for CBD and m/z 329  $\rightarrow$  287 for HU-331. Relative levels of oxidized CBD were measured based on the SRM peak area (m/z 329  $\rightarrow$  287), similar to HU-331 (**Figures S2 and S4**). Peak areas were determined using the auto-integration function in Thermo Xcalibur software.

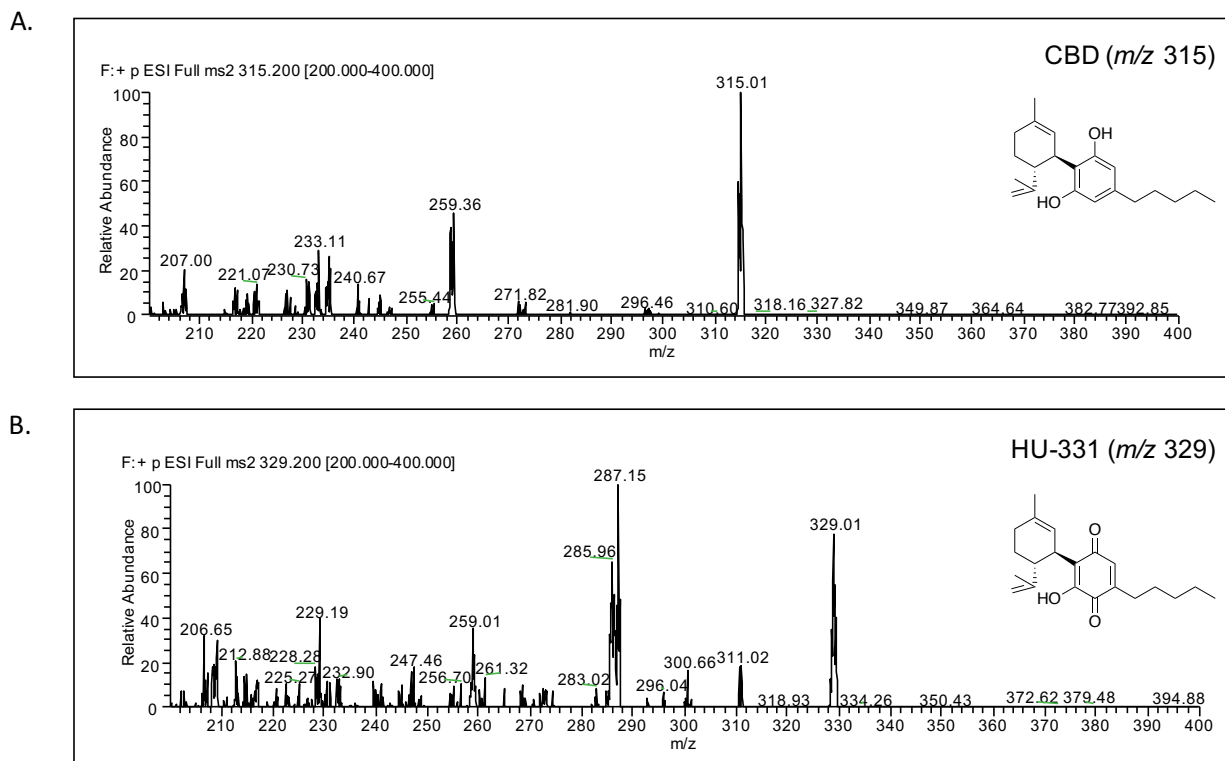

**Figure S1: LC-MS/MS Analysis of Cannabidiol (CBD) and HU-331.** Standard solutions of 20  $\mu$ M CBD (A) and HU-331 (B) were subjected to liquid chromatography - tandem mass spectrometry (LC-MS/MS) analysis via electrospray ionization in positive ion mode. CBD has a precursor ion of *m/z* 315, and HU-331 has a precursor ion of *m/z* 329. Shown are representative product ion spectra generated from collision induced dissociation of CBD (*m/z* 315) (A) and HU-331 (*m/z* 329) (B) at collision energy 21 V.

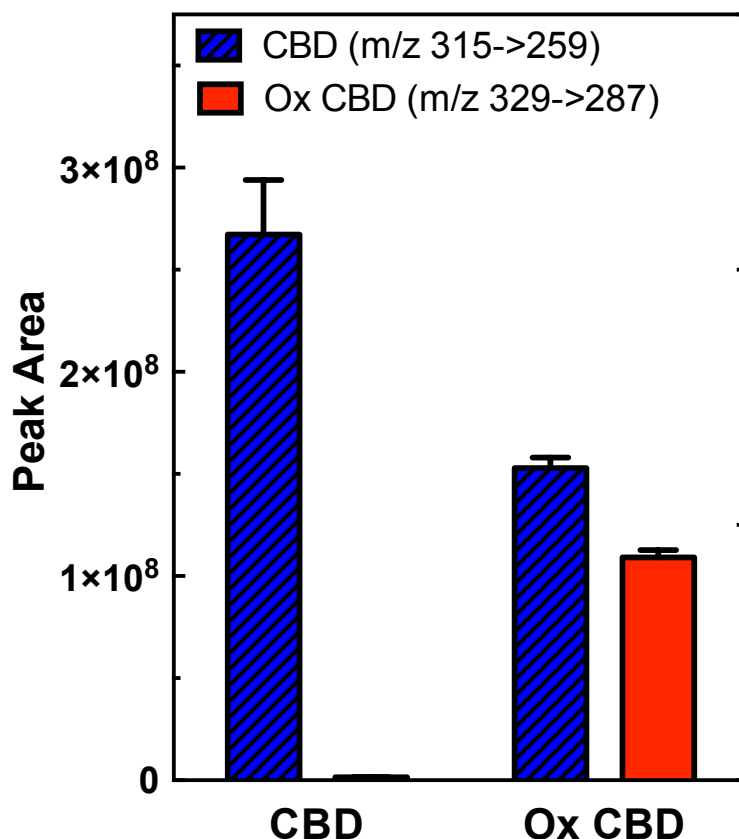

**Figure S2: Analysis of Oxidation of Cannabidiol in Solution.** Pure cannabidiol has a molecular ion at m/z 315 when analyzed by LC-MS/MS in positive ion mode, while HU-331 is observed at m/z 329. Samples of cannabidiol (CBD) and oxidized cannabidiol (Ox CBD) were subjected to LC-MS/MS analysis at matching concentrations. The precursor-to-product ion transitions for CBD (m/z 315>259) and Ox CBD (m/z 329>287) were used to measure relative levels of each compound by selected reaction monitoring. Results above display the peak areas for CBD (m/z 315>259) and Ox CBD (m/z 329>287) in two samples from an initial concentration of CBD at 200  $\mu$ M. Cannabidiol appears to oxidize in solution over time. Results represent the mean of two samples and error bars represent the standard error of the mean.

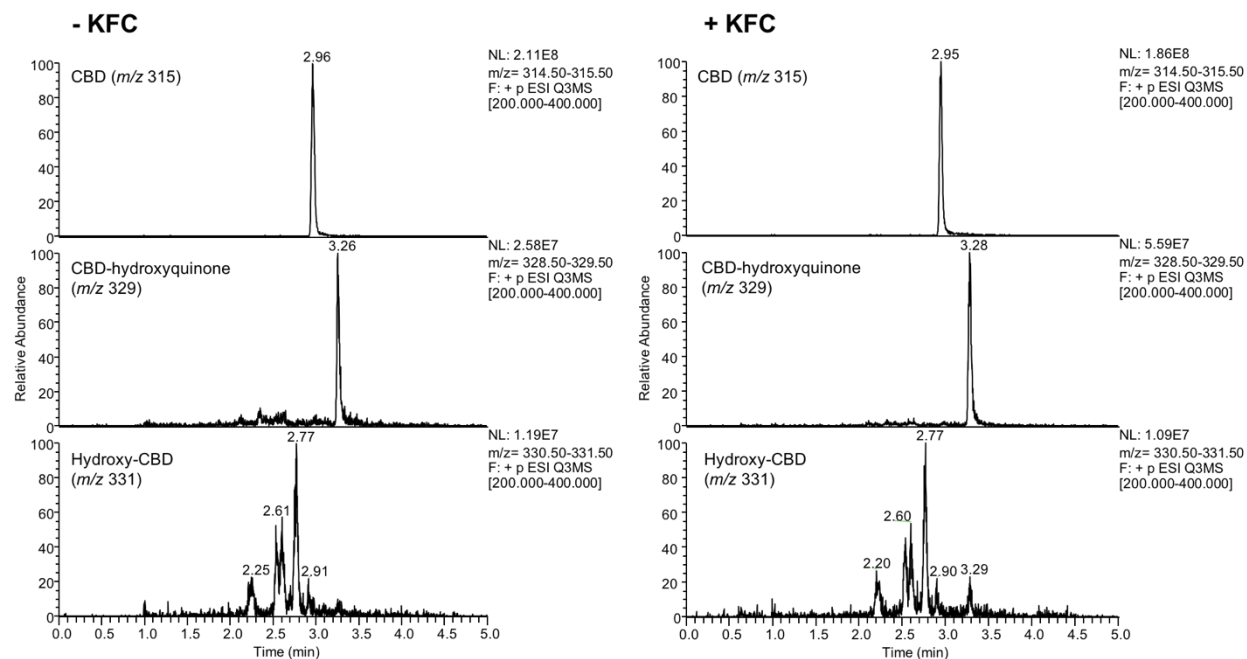

**Figure S3: KFC-oxidized CBD.** LC-MS/MS analysis of oxidized CBD products with and without KFC treatment. Shown are LC-MS extracted ion chromatograms for CBD ( $m/z$  315), CBD-hydroxyquinone ( $m/z$  329), and hydroxy-CBD products ( $m/z$  331) +/- KFC. It should be noted that the hydroxy-CBD products in the -KFC reaction (left lower chromatogram) are the result autooxidation by air since we have also observed no hydroxy-CBD in spectra of pure CBD (see figure 6).

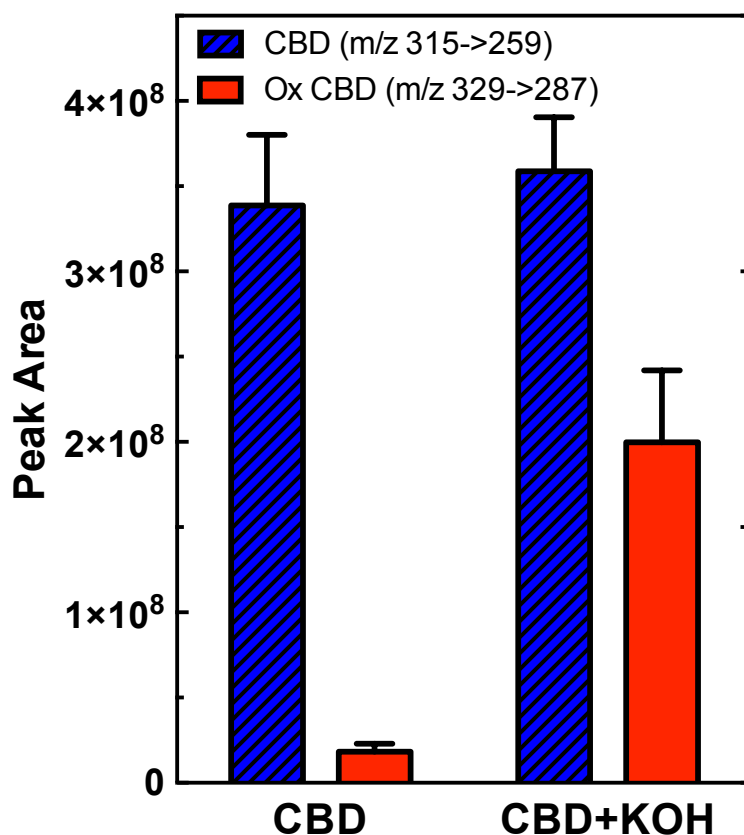

**Figure S4: Analysis of KOH-Oxidized Cannabidiol.** Samples of cannabidiol (CBD) and KOH-oxidized cannabidiol (Ox CBD) were subjected to LC-MS/MS analysis at matching concentrations. The precursor-to-product ion transitions for CBD (m/z 315>259) and Ox CBD (m/z 329>287) were used to measure relative levels of each compound by selected reaction monitoring. Results above display the peak areas for CBD (m/z 315>259) and Ox CBD (m/z 329>287) in two samples from an initial concentration of CBD at 200  $\mu$ M. Results are plotted as the mean of four replicates and error bars represent the standard deviation of those samples.

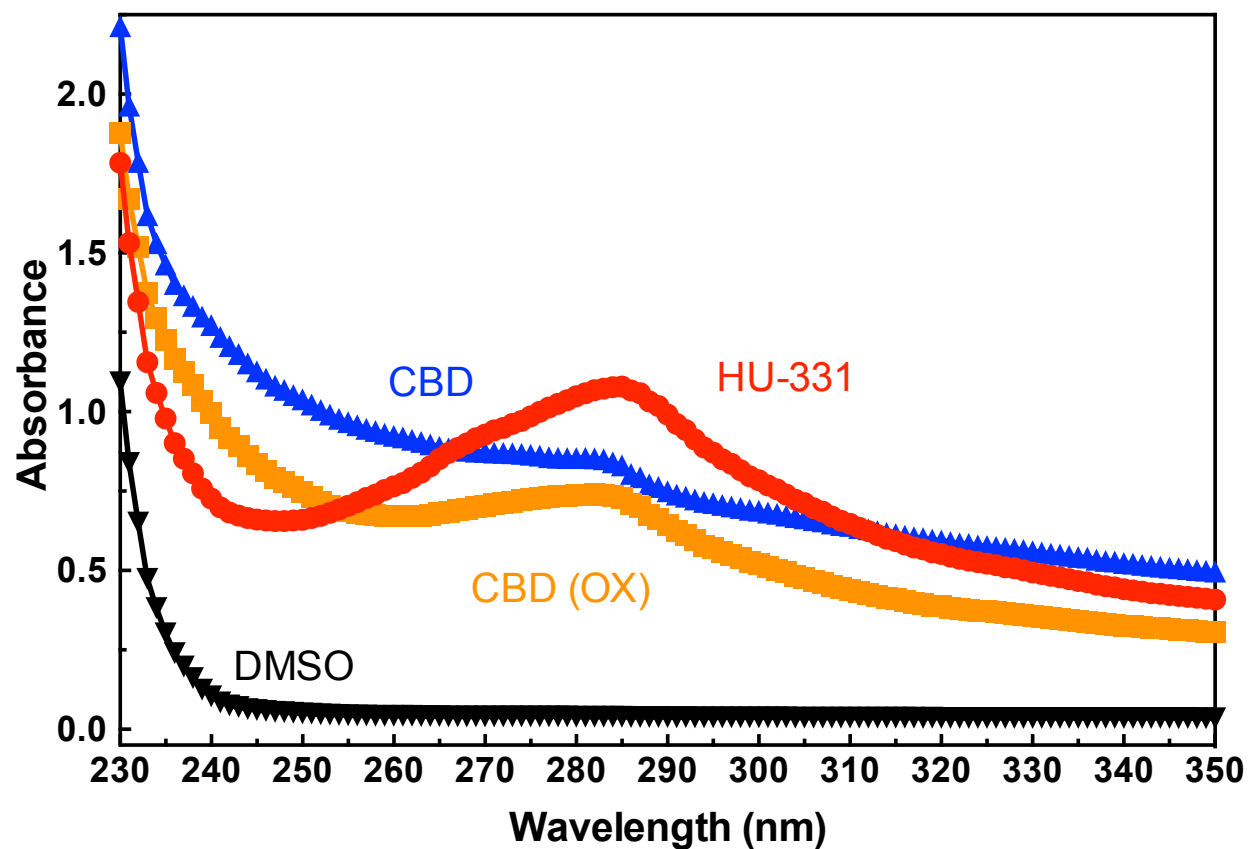

**Figure S5: UV Absorbance Spectra for CBD, Oxidized CBD, and HU-331.** The absorbance spectra at 1 nm resolution for 20 mM CBD, oxidized CBD (ox CBD), and HU-331 are shown.

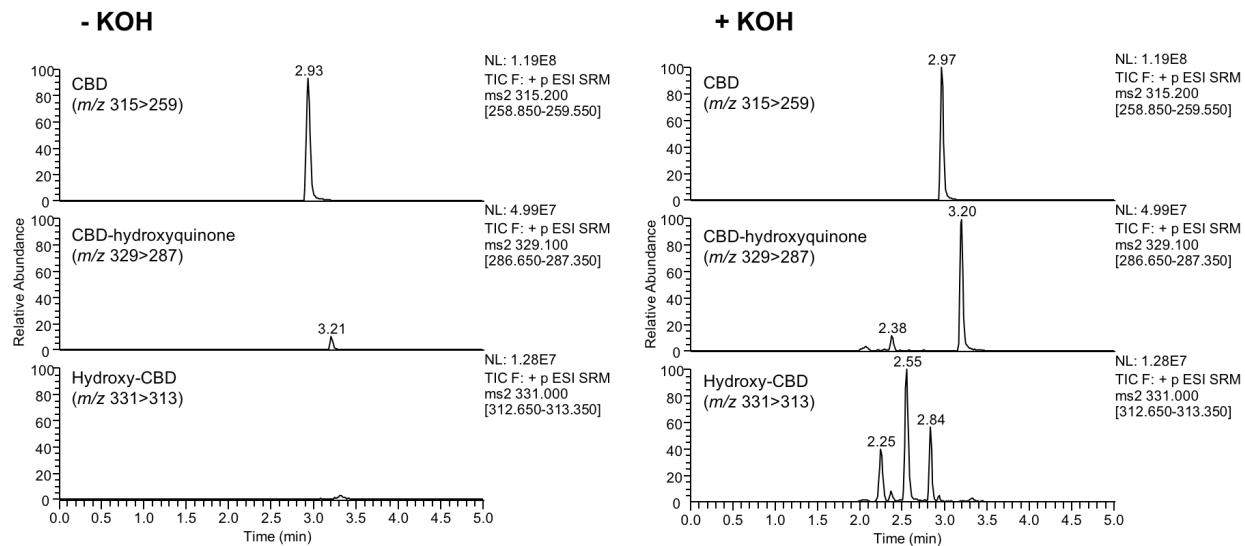

**Figure S6: KOH-oxidized CBD.** LC-MS/MS analysis of CBD oxidized products with and without KOH treatment. Shown are LC-MS/MS chromatograms from selected reaction monitoring (SRM) of CBD ( $m/z$  315>259), CBD-hydroxyquinone ( $m/z$  329>287), and hydroxy-CBD products ( $m/z$  331>313) +/- KOH. The graphs have been scaled equally for comparison of treatment conditions.
